# Supplementary material for: Barriers and enablers of quality high-acuity neonatal care in sub-Saharan Africa: protocol for a synthesis of qualitative evidence
Source: HighWire-hosted journal article supplement (doi:10.1136/bmjopen-2023-081904), 2024-03-01
Supplement: bmjopen-2023-081904supp002_data_supplement.pdf [file bmjopen-2023-081904supp002_data_supplement.pdf]

## JBI QARI Data Extraction Tool for Qualitative Research

Reviewer \_\_\_\_\_ Date \_\_\_\_\_

Author \_\_\_\_\_ Year \_\_\_\_\_

Journal \_\_\_\_\_ Record Number \_\_\_\_\_

### Study Description

Methodology|

\_\_\_\_\_  
\_\_\_\_\_

Method

\_\_\_\_\_  
\_\_\_\_\_

Phenomena of interest

\_\_\_\_\_  
\_\_\_\_\_

Setting

\_\_\_\_\_  
\_\_\_\_\_

Geographical

\_\_\_\_\_  
\_\_\_\_\_

Cultural

\_\_\_\_\_  
\_\_\_\_\_

Participants

\_\_\_\_\_  
\_\_\_\_\_

Data analysis

\_\_\_\_\_  
\_\_\_\_\_

Authors conclusions

\_\_\_\_\_  
\_\_\_\_\_

Comments

\_\_\_\_\_  
\_\_\_\_\_

Complete

Yes

No

Copyright © The Joanna Briggs Institute 2014

| Findings | Illustration form Publication (page number) | Evidence    |          |             |
|----------|---------------------------------------------|-------------|----------|-------------|
|          |                                             | Unequivocal | Credible | Unsupported |
|          |                                             |             |          |             |
|          |                                             |             |          |             |
|          |                                             |             |          |             |
|          |                                             |             |          |             |
|          |                                             |             |          |             |
|          |                                             |             |          |             |
|          |                                             |             |          |             |
|          |                                             |             |          |             |
|          |                                             |             |          |             |
|          |                                             |             |          |             |
|          |                                             |             |          |             |
|          |                                             |             |          |             |

Extraction of findings complete Yes No 

Copyright © The Joanna Briggs Institute 2014
